1 **Title:** Risk of secondary infection waves of COVID-19 in an insular region: the case of the  
2 Balearic Islands, Spain

3

4 **Authors:** Víctor M. Eguíluz<sup>1</sup>, Juan Fernández-Gracia<sup>1</sup>, Jorge P. Rodríguez<sup>2</sup>, Juan M.  
5 Pericàs<sup>3,4</sup>, Carlos Melián<sup>1,5,6</sup>

6

7 **Affiliations:**

8 <sup>1</sup> Instituto de Física Interdisciplinar y Sistemas Complejos IFISC (CSIC-UIB), E07122 Palma  
9 de Mallorca, Spain

10 <sup>2</sup> ISI Foundation, Turin, Italy

11 <sup>3</sup> Infectious Disease Department, Hospital Clínic de Barcelona, Barcelona, Spain.

12 <sup>4</sup> Vall d'Hebron Institute for Research (VHIR), Barcelona, Spain

13 <sup>5</sup> Department of Fish Ecology and Evolution, EAWAG Swiss Federal Institute of Aquatic  
14 Science and Technology, Centre of Ecology, Evolution and Biogeochemistry, Seestrasse 79,  
15 CH-6047, Kastanienbaum, Switzerland

16 <sup>6</sup> Institute of Ecology and Evolution, Aquatic Ecology, University of Bern, Baltzerstrasse 6,  
17 CH-3012, Bern, Switzerland

18

19

20 **Corresponding author:** Víctor M. Eguíluz, [victor@ifisc.uib-csic.es](mailto:victor@ifisc.uib-csic.es)

21

22 **Running title:** Secondary waves of COVID-19 in the Balearic Islands

23

24 **Keywords:** COVID-19, epidemic projection, secondary outbreaks, computational modeling

25

**NOTE:** This preprint reports new research that has not been certified by peer review and should not be used to guide clinical practice.

26 **Abstract**

27

28 The Spanish government declared the lockdown on March 14th, 2020 to tackle the fast-  
29 spreading of COVID-19. As a consequence the Balearic Islands remained almost fully  
30 isolated due to the closing of airports and ports, These isolation measures and the home-based  
31 confinement have led to a low prevalence of COVID-19 in this region. We propose a  
32 compartmental model for the spread of COVID-19 including five compartments (Susceptible,  
33 Latent, Infected, Diseased, and Recovered), and the mobility between municipalities. The  
34 model parameters are calibrated with the temporal series of confirmed cases provided by the  
35 Spanish Ministry of Health. After calibration, the proposed model captures the trend of the  
36 official confirmed cases before and after the lockdown. We show that the estimated number  
37 of cases depends strongly on the initial dates of the local outbreak onset and the number of  
38 imported cases before the lockdown. Our estimations indicate that the population has not  
39 reached the level of herd immunization necessary to prevent future outbreaks. While the low  
40 prevalence, in comparison to mainland Spain, has prevented the saturation of the health  
41 system, this low prevalence translates into low immunization rates, therefore facilitating the  
42 propagation of new outbreaks that could lead to secondary waves of COVID-19 in the region.  
43 These findings warn about scenarios regarding after-lockdown-policies and the risk of second  
44 outbreaks, emphasize the need for widespread testing, and could potentially be extrapolated  
45 to other insular and continental regions.

46

47

48

49

50

## 51 **Introduction**

52 The rapid propagation of the new COVID-19 pandemic requires timely responses, including  
53 the alignment of evidence generation by scientists and decision-making by policy  
54 stakeholders. As of the current date, several mathematical models have been developed to  
55 help policy-making in a wide arrange of interventions in various countries, encompassing  
56 from testing strategies to lockdown measures (1-6). Although modeling pandemics is not  
57 without flaws, and its predicted scenarios cannot be uncritically adopted and therefore  
58 directly translate into policy (7), modeling can be a valuable support tool to guide policy  
59 when assessed in an integrated way.

60

61 Recent studies have dealt with the possibility of a second-wave of COVID-19 after the  
62 retirement of lockdown and confinement measures in China (1-2). Recently, the value of  
63 restrictive social distancing measures has been recommended in Italy (8). The analysis of data  
64 from closed confinements such as sea cruises allows us to address some key questions  
65 regarding the risk of second waves in an environment without external perturbations (9,10).  
66 The study of the evolution of the pathogen in islands offers an opportunity to learn how the  
67 propagation occurs, and how the mobility restrictions are shaping the propagation in  
68 relatively isolated areas, either due to transport lockdowns implemented to contain COVID-  
69 19 dissemination or because of their geographical conditions.

70

71 The Balearic Islands archipelago is composed of four inhabited islands in the Mediterranean  
72 Sea, i.e Majorca, Menorca, Ibiza, and Formentera, with a total population of 1,095,426, as per  
73 2011 data (11). The main economic activity is tourism with principal connections to the UK  
74 and Germany. The first reported case in Spain was identified in the Canary Islands on  
75 January 31st, while in the Balearic Islands the first case (second in Spain) was confirmed on

76 February 9th. He was a British citizen resident in Majorca who had been in contact with an  
77 infected person with SARS-CoV-2 during a stay in France from January 25-29. In Spain, the  
78 schools were closed on March 16th and the lockdown was implemented at the national scale  
79 from March 17th. As of April 11th, the number of infected in the Balearic Islands was 140  
80 per 100,000 inhabitants to be compared with 354 in Spain (data updated with values of April  
81 11th, 2020) (12). The lockdown of the Balearic Islands includes the closing of airports and  
82 ports for passengers, rendering the archipelago a virtually closed system. In this regard,  
83 archipelagos are “living laboratories” suggesting insights about the ecology and evolution of  
84 infectious diseases and offering unique experimental testing protocols to reduce or eliminate  
85 the diseases not only in the islands but potentially across the world (13). Thus, the Balearic  
86 Islands present an opportunity to be used as a benchmark to explore how isolation and after-  
87 lockdown measures impact secondary COVID-19 waves.

88  
89 COVID-19 has a particular structure in the timings of the disease that make it particularly  
90 dangerous in terms of a silent spreading potential. First, the incubation period, i.e the time  
91 since infection to symptom onset, is relatively large around 5.2 days (95% confidence  
92 interval [CI], 4.1 to 7.0) (14). This itself is a driver of the predictability of the spatiotemporal  
93 patterns to expect from this disease (15). Furthermore, the latent period, i.e the time since  
94 infection to the start of being infectious, does not align completely with the incubation period  
95 (4). This leaves a period of presymptomatic infectivity, that increases  $R_0$  through silent  
96 spreading, as not even the carrier might be aware of its own infectivity (16). The relative  
97 effectiveness of different non-pharmaceutical interventions will depend critically on the  
98 relation of those times (incubation and latent period) (17). Other related periods that shape  
99 the dynamics of the outbreaks are the generation interval (time between infection of infector-  
100 infectee pairs) (18) and the serial interval (the time between symptom onsets of an infector-

101 infectee pair), which has also been used to estimate viral shedding dynamics for COVID-19  
102 (4).

103

104 We aimed to study the dissemination of COVID-19 in a quasi-isolated system through a  
105 compartmental model that included, besides the susceptible (S), diseased (D) and recovered  
106 (R) compartments, an exposed (E) compartment, and a pre-symptomatic (I) infective  
107 compartment to account for the incubation period, as the times of transit between the latter  
108 two compartments are crucial for the modeling of COVID-19 (3,4). Due to population size,  
109 we can implement an individual-based model where we consider each inhabitant as an  
110 individual in the model. In particular, first, we compare the results of an individual-based  
111 model tailored for the Balearic Islands and identify the parameter values that best fit the data.  
112 Second, we explore the likelihood of a second-wave scenario as a function of the initial date  
113 of the first imported case and the number of imported cases before the lockdown.

114

115

## 116 **Results**

### 117 *Number of active infected cases*

118 The best fit of the model to the confirmed cases, allows us to extract the transmission  
119 probabilities and also the scaling factor that captures the ratio between the estimated and the  
120 confirmed cases. For the scenario where the initial date was on Feb 7<sup>th</sup>, and a latent period of  
121 2 days ( $T_{\text{lat}}=2$ ), an infective period of 4 days ( $T_{\text{inf}}=4$ ), and disease period of 12 days ( $T_{\text{dis}}=12$ ),  
122 the values of the infection probability leading to the best fit are  $\beta_1=0.24$ ,  $\beta_2=0.12$ ,  $\beta_3=0.016$ ,  
123 and  $\beta_4=0.036$  (Figure 1). This translates into an initial basic reproductive number  $R_0= 3.84$ .  
124 The fitting of the data also informs us that the correction factor is 0.054, that is, that the  
125 confirmed cases are 5.4% of the model estimates. At the same time, we obtain that the

126 percentage of added healed cases and fatalities according to the official sources the model  
127 estimate are 5.3% of the confirmed cases. For the other values of the latent, infective, and  
128 disease periods, we obtain similar accuracy, given by  $\chi^2$  and similar scaling factors (Table  
129 S1). The scaling factor, which gives the fraction of the model estimates, that corresponds to  
130 the confirmed case, increases to 10% in the case of  $T_{\text{lat}}=5$ ,  $T_{\text{inf}}=1$ , which is the case with less  
131 infected individuals in the model.

132

133 The introduction of a single imported infected case after the first wave has expired strongly  
134 correlates with the risk of a secondary wave (Figure 2). The intensity and duration of the  
135 second wave depend on specific values capturing the conditions applicable when newly  
136 infected cases appear, e.g the transmission probability, which depends on the habits of the  
137 population, hygiene, and social distancing, and mobility restriction. Qualitatively similar  
138 results were obtained for the other set of values. The peak of the second wave is very  
139 sensitive to the date of the first exposure. If it happened on January 28<sup>th</sup>, the intensity of the  
140 second peak is less pronounced and similar to the one for the first peak, in contrast to the case  
141 of a more recent exposure, when the second peak can be more than one decade larger the first  
142 peak.

143

#### 144 *Herd immunization estimates*

145 Assuming recovered individuals get immunity, to estimate whether the Balearic Islands have  
146 reached herd immunization, we explored the estimated number of infected under two  
147 immunization scenarios based on the date of the first infection (Figure 3A) and the number of  
148 imported cases before air and maritime transport lockdown (Figure 3B). Firstly, we analyzed  
149 how the estimation of infected individuals is sensitive to the date of the first infection. We  
150 explored the time range of the first infection from January 28<sup>th</sup> (which corresponds to the stay

151 in France before returning to Majorca) to Feb 7<sup>th</sup> (which corresponds to 30 days before the  
152 10th confirmed case). Secondly, we explored the estimates under the assumption that more  
153 than one imported case could have gone unnoticed into the Balearic Islands before the closing  
154 of the airports. Depending on these two parameters, the range of immunization spans from  
155 3% (for one initial infected on February 7th) to 64% (for 20 initial infected cases on January  
156 28th). With the assumption of immunity after recovery, the achievement of herd  
157 immunization in the population is very sensitive to the date of the first infection and the  
158 number of imported cases before air and maritime transport lockdown. The interpretation of  
159 herd immunization indicates that if infected individuals become immune, then 20% of herd  
160 immunization prevents the spreading of reproductive numbers smaller than 1.25. Assuming  
161 that the first case was exposed to the infection during his stay in France in the last days of  
162 January, the percentage of the population that was infected can be as high as 50%, which  
163 could prevent a high second peak, for values of the basic reproductive number below 2.  
164 Conversely, if the first case was infected 30 days before 11 confirmed cases were reported in  
165 the Balearic Islands, the percentage of infected individuals could lower to less than 10%,  
166 therefore falling far from potential herd immunity (only for values of the basic reproductive  
167 number below 1.1). The relation between the number of initial infected cases, the date of the  
168 first infection, the number of cases, and the number of confirmed cases is further explored in  
169 the Supplementary Material.

170

## 171 **Discussion**

172 Our study shows that a model including five compartments together with information on  
173 mobility between municipalities can be used to capture the spread of the epidemics in a  
174 closed community. The validation of the model with the official data allowed us to obtain the  
175 parameters that best fitted the data. Once the model was validated, we extracted an estimation

176 of the number of the total infected in the Balearic Islands that indicates, assuming  
177 immunization after recovery, that these figures would reach the herd immunization threshold  
178 depending critically on the date of the first infection and the initial number of seeds, being  
179 herd immunization achievement more likely for an initial date before January 31st and  
180 number of initial infected above 10. Our exploration of the forecasted scenario of a newly  
181 infected individual entering the community after the lockdown confirmed that the number of  
182 potential cases widely varies according to the initial date of infection, which correlates with  
183 the percentages of immunity. Although we cannot determine with precision the start of the  
184 infection in the Balearic Islands, the model suggests that the Balearic Island population is  
185 below the herd immunization threshold and thus, also susceptible to new outbreaks  
186 depending on how immunity is acquired and how the mobility restrictions are further  
187 implemented. In particular mobility and transmission probability, which depends on the  
188 general use of masks and hygiene protocols by the population, might alter the attack rate.  
189  
190 Focusing on second waves in insulated areas during the COVID-19 pandemic is of great  
191 value to analyze the spreading and containment of infectious diseases, where the lockdown of  
192 islands constitutes a paradigmatic scenario, with the potential to be applied to continental  
193 regions (13). The use of modeling tools is a complement to field studies that can be used to  
194 anticipate the progress of a pandemic and thus help health authorities to make decisions. In  
195 the case of the Balearic Islands, there are two foremost advantages in terms of model  
196 precision. First, since the incidence during the first peak was relatively low and hospital  
197 capacity including ICU beds was not overpassed, the forecasted scenario of a second wave  
198 presenting with more intensity is more feasible than in other areas. Second, the relatively  
199 small size of the Balearic Islands and the organization of health and epidemiological  
200 surveillance systems make the official accounts of reported cases more reliable than in other



201 areas were due to low rates of testing, overloaded hospitals, and lack of centralized data  
202 collection hampered the initial estimates.

203

204 The implications of the forecasted potential second wave yielded by our model for an insular  
205 territory can be useful also for other areas that either naturally geographically isolated or  
206 closed to external perturbations due to strict lockdowns. According to our results, the date of  
207 the first infection and the import of cases while the airports and ports were open appear to be  
208 key to assess the likelihood and intensity of future waves and outbreaks. Knowing the  
209 approximate date of infection of the first reported case in an outbreak proved critical to  
210 estimate the current and foreseen number of cases. Whether a second wave occurs and the  
211 intensity of the peak strongly depended on the date of the first infection, as the number of  
212 infected cases grows exponentially, but also on the number of imported cases, which  
213 contribute additively to the number of cases, and also on the real herd immunization. Our  
214 estimates rely on calculations assuming conditions far from the behavior of the population,  
215 and on the habits, for example, regarding hygiene, the use of masks, and social distancing, of  
216 the population after the lockdown is relaxed.

217

218 Our model is an individual-based model for which, due to the population size, we identify  
219 each inhabitant with an individual in the simulation model. This approach is different from  
220 other models considering pan-mixing and ordinary differential equations (8). Other  
221 approaches implement recurrent mobility (3,19,20), which selects the individuals that perform  
222 the commuting randomly at each iteration step, thus increasing the mixing in the complete  
223 population. Our approach assigns a residence and a working municipality as initial condition  
224 and these locations remain unchanged during the time evolution for the model. Our  
225 implementation assumes that the same person commutes between two locations and thus it

226 has to be fixed initially in the model. A random selection at each day will increase the  
227 number of effective connections, which could be compensated by a reduction in the  
228 transmission probability. We believe this approach is more comprehensive and better  
229 captures the reality of commuting under home confinement conditions, which essentially  
230 limit mobility from households to workplaces for those individuals that cannot work at  
231 distance or are not exempted from any work under the regulations of each country, while the  
232 rest of the population are not supposed to move from the vicinity of their households and  
233 even so just for justified reasons as basic food supply. We use here a stochastic approach  
234 similar to other works (19,21) which lets us compute confidence intervals even for single  
235 combinations of the parameters instead of deterministic ordinary differential equations  
236 (8,22,23) or discrete-time dynamic equations (3). We also use a fixed time for the transit  
237 through the E, I, and D compartments,  $T_{lat}$ ,  $T_{inf}$ , and  $T_D$  respectively. We believe this approach  
238 is more realistic than an approach based on rates, where individuals transit the compartments  
239 at a given rate, giving rise to exponentially distributed times of transit through the  
240 compartments. In this case, infected will have the opportunity to be infectious immediately,  
241 or to transit the I compartment also immediately, bringing the start of secondary infections  
242 closer to the time they were infected for many individuals. A similar effect happens with the  
243 length of the disease (time in the D compartment), having then individuals that immediately  
244 recover.

245

246 The model also has several limitations. First, as it is constructed for fitting the global  
247 numbers of infected patients, it is missing finer structure, needed for the evaluation of risks of  
248 subpopulations that are differently exposed to the virus or have different outcomes, such as  
249 the population of elderly people or health workers. Second, for COVID-19 there is evidence  
250 of three main transmission channels, namely direct contact with an infected individual with

251 symptoms (14), contacts with an asymptomatic individual (24,25), and environmental  
252 transmission (26). The present model takes into account the first two modes of transmission,  
253 but not the environmental one explicitly, although probably the fitting has assigned part of  
254 this transmission to the processes included in our model. Therefore, there is not a direct way  
255 of measuring the effect of interventions to reduce environmental transmission. Third, the  
256 model also considers asymptomatic and symptomatic individuals to be infectious in the same  
257 way, although the viral shedding in asymptomatic individuals is indeed lower (5). This can  
258 have a mild impact on the number of infected individuals that the model predicts. Fourth, the  
259 model assumes that the mobility restrictions are applied in the same way to all of the agents  
260 in the system and thus is lacking the fact that symptomatic infected individuals will modify  
261 their mobility drastically, either if they are quarantined at home or admitted to a hospital. We  
262 are therefore overestimating mobility, but this is probably passed to the infectivity in the  
263 fitting procedure. Fifth, the model also takes fixed times to transit through the E, I, and D  
264 compartments ( $T_{lat}$ ,  $T_{inf}$  and  $T_D$ , respectively), which is artificial. More refined models would  
265 take this transit times from specified distributions matching the parameters of the disease  
266 (21,23). While this will render the model a more realistic approach, we believe that fixing the  
267 times is a good compromise between using rates for transiting the compartments and  
268 implementing distributions for those times, as it already captures the delays induced by these  
269 particular timings of the infection. Finally, the model also assumes that individuals are  
270 granted immunity to the virus, at least for the timescales explored here.

271

272 In conclusion, the risk of secondary infection waves should be comprehensively and  
273 cautiously addressed before removing confinement measures. Our study provides several  
274 relevant findings that could be useful to support policy design at avoiding second waves once  
275 measures to return to the societal usual activities start to be applied. First, the isolation of

276 asymptomatic individuals that tested positive for COVID-19 and close contacts to infected  
277 individuals during the prior two weeks might reduce the number of new infections after the  
278 establishment of the usual activity by preventing dissemination from asymptomatic carriers  
279 during the incubation period. This requires proper testing strategies tailored according to the  
280 estimated prevalence of infection, population density, the openness of the community, and  
281 other relevant factors. Second, contact tracing measures are crucial, and digital tools might  
282 enhance the identification of high-risk individuals to be tested or preemptively isolated (27).  
283 Yet, data privacy and other relevant ethical considerations should be carefully balanced when  
284 designing contact tracing in the community. Third, progressive return to the normal activity  
285 instead of an abrupt change will facilitate the monitoring of new cases and may avoid a sharp  
286 growth of the number of infected individuals, which is expected when herd immunity has not  
287 been reached. Further modeling studies on second-waves of COVID-19 are warranted to  
288 strengthen the knowledge on the best theoretical assumptions and data to be used to increase  
289 forecasting precision. In addition, these models should be validated through real-world data  
290 as these are collected during and after the pandemic.

291

292

## 293 **Material and Methods**

### 294 *Data*

295 Population data for the 67 municipalities in the Balearic Islands were taken from the Instituto  
296 Nacional de Estadística (INE, Spain), which gathers all the census data (11). The census also  
297 provides the commuting flows for people that, according to the registry, are living in one  
298 municipality and work in another. This allows assigning a living location and working  
299 location to each individual. For small municipalities, these commuting fluxes are not  
300 included. We avoid the isolation of these municipalities considering commuting flows of 10  
301 people towards each of the neighboring municipalities and Palma, the capital of Balearic  
302 Islands.

303

304 Data for the active infected and accumulated infected cases are obtained from the Ministry of  
305 Health (12). In particular, the official reports provide data on the accumulated number of  
306 infected, healed, and deaths. The number of active infected cases is taken as the number of  
307 accumulated infected and subtracting deaths and healed. Unfortunately, the values for healed  
308 cases are only reported from March 22nd. Thus for the fitting, we only considered values  
309 starting from March 22nd.

310

### 311 *Model*

312 The relatively small population size of the Balearic Islands allows us to develop an  
313 individual-based model. Each individual is placed in one of 67 municipalities according to  
314 the census (Figure S1). The mobility between municipalities is considered with commuting  
315 data from the 2011 census provided by the INE (11). For each simulation day, we consider  
316 two steps, one where each individual is located in its residence municipality, and a second  
317 step where each individual is placed in the working place. At each step, individuals can

318 interact with any of the individuals placed at the same location. The locations assignment is  
319 made by randomly selecting a residence and a working place respecting the populations from  
320 the data. This assignment is done initially and such positions remain unchanged during the  
321 time evolution of the model.

322

323 The states of the individuals correspond to a SEIDR model: S, susceptible; E, exposed,  
324 corresponding to the latent period; I, infectious, corresponding to the presymptomatic  
325 infective period; D, diseased, corresponding to be infective with or without symptoms; and R,  
326 recovered. The transitions between these states are as follows, S becomes E in contact with  
327 an infected (I or DI) with probability  $\beta$ . After  $T_{lat}$  (latent period) days, E becomes I; after  $T_{inf}$   
328 (presymptomatic infective period) days I becomes D, and after  $T_{dis}$  (disease), D becomes R.

329

330 The values of  $T_{lat}$ ,  $T_{inf}$ , and  $T_{dis}$  were obtained from the time evolution of the number of active  
331 infected and accumulated infected cases in the Balearic Islands. The lockdown was imposed  
332 in Spain on March 16th and the effect of the mobility restrictions can be identified on March  
333 22nd. The 6 days in this period are reflected in the condition  $T_{lat} + T_{inf}$  (Figure S2A). Finally,  
334 from the data on the accumulated number of infected, the change in slope is observed on  
335 April 2nd, that is,  $T_{dis} = 12$  days (Figure S2B).

336

337 To implement the mobility restrictions, we observe from the data that the accumulated  
338 number of infected shows a bending every 7 days approximately, which is in accordance with  
339 the beginning of the lockdown, and the restriction imposed on March 15th, and later  
340 corrected on March 22nd and March 29th. Thus the model has the freedom to adjust the  
341 infection probability every week after March 15th.

342

343 For a single day, the modeling proceeds as follows,

- 344 - 1. First, it considers the population in their residence location, for each municipality  
345 pairs of individuals in the same municipality are selected, say  $i$  and  $j$ . Then,  $i$  updates  
346 his/her state according to the dynamic rules. For each municipality  $p$ ,  $N_p$  pairs are  
347 chosen randomly where  $N_p$  is the population size of the municipality  $p$ .
- 348 - 2. Second, we consider the individuals distributed in the municipalities of work. For  
349 each municipality  $p'$ , we chose  $N_{p'}$  pairs of random individuals working in the same  
350 municipality  $p'$ .
- 351 - 3. Resume from 1.

352 Thus, on average, in a day, each individual is updated once.

353 For calibration, the model is run exploring all the parameters:

- 354 -  $T_{\text{lat}} + T_{\text{inf}} = 6$   
355 -  $T_{\text{dis}} = 12$

356 and  $\beta$  is explored in the range  $[0,1]$  in the following periods:

- 357 -  $\beta_1$  from the origin of the infection on February 9th to March 15<sup>th</sup>,  
358 -  $\beta_2$  from March 16th to March 22nd,  
359 -  $\beta_3$  from March 23th to March 29th,  
360 -  $\beta_4$  from March 30th to April 5th,  
361 -  $\beta_5$  from April 7th to April 11th

362

363 The total number of infected depends on the date of the first infection. Models assume that  
364 the beginning of the outbreak is typically 30 days before the day when 10 infections are  
365 recorded (28). In the case of the Balearic Islands, on March 8th, 11 confirmed cases were  
366 reported. The first case reported in the Balearic Islands corresponds to an imported infection  
367 notified on February 9th. Consequently, the beginning of the outbreak was set on February

368 7th, two days before the first infected was identified. Thus, we explore the date of the  
369 beginning of the infection between Jan 28th and Feb 7th.

370

### 371 *Model validation*

372 The results of the model are validated with the official number of active infected and the  
373 accumulated number of infected cases between March 15<sup>th</sup> and April 11th. As the official  
374 values do not take into account the non-tested asymptomatic and the diseased not consulting  
375 to the healthcare systems, we assume that the reported values are a proportion of the values  
376 obtained from the model. Then, to validate the model parameters we minimize  $\chi^2$ ,  $\chi^2 = \sum (\alpha Y_i$   
377  $- y_i)^2$ , where  $\alpha$  is a scale factor, that is, the ration between estimated and confirmed cases,  $Y_i$  is  
378 the value obtained from the model in day  $i$ , and  $y_i$  is the official value in day  $i$ . Due to the  
379 initial exponential growth of the epidemics, we calculate  $\chi^2$  for the logarithm of the cases:  
380  $\chi^2 = \sum (\log(\alpha Y_i) - \log(y_i))^2$ . The minimization of  $\chi^2$  leads to an optimal scale factor  $\log(\alpha^*)$   
381  $= 1/n \sum (\log(y_i / Y_i))$ . For this value of  $\alpha^*$ , we finally calculate the optimal values. Our  
382 assumption implies that the scale factor should be similar to both the active and accumulated  
383 infected.

384

385 For each set of parameters, we report the  $\chi^2$  of the model values of the number of active  
386 infected cases with respect to the official values, the correction fraction  $\alpha_{\text{active}}$ , and the  $\chi^2_{\text{acc}}$  of  
387 the model values of the number of accumulated infected individuals with respect to the  
388 official vales and the correction fraction  $\alpha_{\text{acc}}$ . For each set of parameters, the best fit is  
389 considered as the one leading to the minimum  $\chi^2$ . Once the fitting values are determined, we  
390 calculate  $\chi^2_{\text{acc}}$  and  $\alpha_{\text{acc}}$  For each set of periods ( $T_{\text{lat}}$ ,  $T_{\text{inf}}$ ,  $T_{\text{dis}}$ ), we explore the infection  
391 probabilities that minimize  $\chi^2$  of the number of active infected cases. The value of  $\chi^2$  and



392 scale factors  $\alpha^*$  of the best fits are shown in Table S1 and the estimated incidence in Table  
393 S2.

394

### 395 *Herd immunity assumptions*

396 An approximation to the herd immunity threshold is given by  $1-1/R_0$  (29), which for COVID-  
397 19 is expected to be between 29 and 74%, taking  $R_0$  between 1.4 and 3.9 (14,30). To explore  
398 whether the number of accumulated infections reach the herd immunity threshold and  
399 therefore avoidance of potential second waves is to be expected, we run the model for the  
400 same parameters leading to the best fit (29). After the system has relaxed to zero infection, we  
401 select a random susceptible from the populations and infected her. As we are interested in  
402 whether the epidemics will spread again, we use the transmission rate obtained at the  
403 beginning of the epidemics in the Balearic Islands, that is, before any restriction on mobility  
404 had been applied. We can expect that once the mobility restrictions have been removed, the  
405 transmission will be reduced in comparison to the initial values, especially due to an  
406 improvement in the hygiene of the population. This will affect how fast the COVID-19 will  
407 spread and the intensity of the wave. If the estimated number of infected is lower than the  
408 threshold for herd immunization, we assume that the COVID-19 will spread. In the  
409 Supplementary Material, we show how the data can be collapsed using a proper combination  
410 of the initial number of infected cases and the time of the first infection.

411

412 **Acknowledgments**

413 V.M.E. and J.F.G. acknowledge funding from the Ministry of Science and Innovation (Spain)

414 and FEDER through project SPASIMM [FIS2016-80067-P (AEI/FEDER, UE)]. JFG

415 acknowledges funding through the postdoc program of the University of the Balearic Islands.

416

417 **Authorship contributions**

418 V.M.E. and J.F.G. designed the work, V.M.E. performed the analysis, V.M.E J.F.G J.P.R

419 J.M.P and C.M. prepared the figures, tables, wrote the first draft and provided final approval

420 to the manuscript. The corresponding author attests that all listed authors meet authorship

421 criteria and that no others meeting the criteria have been omitted.

422

423 **Competing interests' declaration**

424 None of the authors declare potential conflict of interest, either financial or non-financial,

425 with regards to the current work.

426

427

428 **References**

429

430 1. K. Leung, J.T. Wu, D. Liu, G.M. Leung. First-wave COVID-19 transmissibility and  
431 severity in China outside Hubei after control measures, and second-wave scenario planning: a  
432 modeling impact assessment. *Lancet* 395, P1382-1393 (2020). DOI:  
433 [https://doi.org/10.1016/S0140-6736\(20\)30746-7](https://doi.org/10.1016/S0140-6736(20)30746-7)

434

435 2. Lei Zhang, Mingwang Shen, Xiaomeng Ma, Shu Su, Wenfeng Gong, Jing Wang, Yusha  
436 Tao, Zhuoru Zou, Rui Zhao, Joseph Lau, Wei Li, Feng Liu, Kai Ye, Youfa Wang, Guihua  
437 Zhuang, Christopher K Fairley. What is required to prevent a second major outbreak of  
438 SARS-CoV-2 upon lifting the quarantine of Wuhan city, China. *medRxiv*  
439 2020.03.24.20042374 (2020); doi: 10.1101/2020.03.24.20042374. Available at  
440 <https://www.medrxiv.org/content/10.1101/2020.03.24.20042374v1>

441

442 3. Alex Arenas, Wesley Cota, Jesus Gomez-Gardeñes, Sergio Gómez, Clara Granell, Joan T.  
443 Matamalas, David Soriano-Panos, Benjamin Steinegger. A mathematical model for the  
444 spatiotemporal epidemic spreading of COVID19. *medRxiv* (2020). 03.21.20040022; doi:  
445 10.1101/2020.03.21.20040022. Available at  
446 <https://www.medrxiv.org/content/10.1101/2020.03.21.20040022v1>

447

448 4. Xi He, Eric H. Y. Lau, Peng Wu, Xilong Deng, Jian Wang, Xinxin Hao, Yiu Chung Lau,  
449 Jessica Y. Wong, Yujuan Guan, Xinghua Tan, Xiaoneng Mo, Yanqing Chen, Baolin Liao,  
450 Weilie Chen, Fengyu Hu, Qing Zhang, Mingqiu Zhong, Yanrong Wu, Lingzhai Zhao,  
451 Fuchun Zhang, Benjamin J. Cowling, Fang Li and Gabriel M. Leung . Temporal dynamics in

452 viral shedding and transmissibility of COVID-19. *Nat Med* (2020); doi: 10.1038/s41591-020-  
453 0869-5. Available at: <https://rdcu.be/b3ADi>

454

455 5. Neil M Ferguson, Daniel Laydon, Gemma Nedjati-Gilani, Natsuko Imai, Kylie Ainslie,  
456 Marc Baguelin, Sangeeta Bhatia, Adhiratha Boonyasiri, Zulma Cucunubá, Gina Cuomo-  
457 Dannenburg, Amy Dighe, Iliaria Dorigatti, Han Fu, Katy Gaythorpe, Will Green, Arran  
458 Hamlet, Wes Hinsley, Lucy C Okell, Sabine van Elsland, Hayley Thompson, Robert Verity,  
459 Erik Volz, Haowei Wang, Yuanrong Wang, Patrick GT Walker, Caroline Walters, Peter  
460 Winskill, Charles Whittaker, Christl A Donnelly, Steven Riley, Azra C Ghani.. Impact of  
461 non-pharmaceutical interventions (NPIs) to reduce COVID19 mortality and healthcare  
462 demand. Imperial College COVID-19 Response Team Report. (2020), March 16; doi:  
463 10.25561/77482. Available at: [https://www.imperial.ac.uk/](https://www.imperial.ac.uk/media/imperial-)

464 [college/medicine/sph/ide/gida-fellowships/Imperial-College-COVID19-NPI-modelling-16-](https://www.imperial.ac.uk/media/imperial-college/medicine/sph/ide/gida-fellowships/Imperial-College-COVID19-NPI-modelling-16-03-2020.pdf)  
465 [03-2020.pdf](https://www.imperial.ac.uk/media/imperial-college/medicine/sph/ide/gida-fellowships/Imperial-College-COVID19-NPI-modelling-16-03-2020.pdf)

466

467 6. Robert Verity, Lucy C Okell, Iliaria Dorigatti, Peter Winskill, Charles Whittaker, Natsuko  
468 Imai, Gina Cuomo-Dannenburg, Hayley Thompson, Patrick G T Walker, Han Fu, Amy  
469 Dighe, Jamie T Griffin, Marc Baguelin, Sangeeta Bhatia, Adhiratha Boonyasiri, Anne Cori,  
470 Zulma Cucunubá, Rich FitzJohn, Katy Gaythorpe, Will Green, Arran Hamlet, Wes Hinsley,  
471 Daniel Laydon, Gemma Nedjati-Gilani, Steven Riley, Sabine van Elsland, Erik Volz, Haowei  
472 Wang, Yuanrong Wang, Xiaoyue Xi, Christl A Donnelly, Azra C Ghani, Neil M Ferguson.  
473 Estimates of the severity of coronavirus disease 2019: a model-based analysis. *Lancet Infect*  
474 *Dis* (2020) Mar 30. pii: S1473-3099(20)30243-7. DOI: [https://doi.org/10.1016/S1473-](https://doi.org/10.1016/S1473-3099(20)30243-7)  
475 [3099\(20\)30243-7](https://doi.org/10.1016/S1473-3099(20)30243-7)

476

- 477 7. D. Sridhar, M.S. Majumder. Modelling the pandemic. *BMJ* 369, m1567  
478 (2020). doi: <https://doi.org/10.1136/bmj.m1567>  
479
- 480 8. Giulia Giordano, Franco Blanchini, Raffaele Bruno, Patrizio Colaneri, Alessandro Di  
481 Filippo, Angela Di Matteo, Marta Colaneri, Modelling the COVID-19 epidemic and  
482 implementation of population-wide interventions in Italy, *Nat. Med.* (2020)  
483 <https://doi.org/10.1038/s41591-020-0883-7>  
484
- 485 9. K. Mizumoto, K. Kagaya, A. Zarebski, G. Chowell. Estimating the asymptomatic  
486 proportion of coronavirus disease 2019 (COVID-19) cases on board the Diamond Princess  
487 cruise ship, Yokohama, Japan, 2020. *Eurosurveillance* 25, pii=2000180 (2020); doi:  
488 [10.2807/1560-7917.ES.2020.25.10.2000180](https://doi.org/10.2807/1560-7917.ES.2020.25.10.2000180).  
489
- 490 10. S. Zhang, M. Diao, W. Yu, L. Pei, Z. Lin, D. Chen. Estimation of the reproductive  
491 number of novel coronavirus (COVID-19) and the probable outbreak size on the Diamond  
492 Princess cruise ship: A data-driven analysis. *Int J Infect Dis*; 93, 201-4 (2020).  
493
- 494 11. Censo de Población y Viviendas 2011. Instituto Nacional de Estadística (Spain).  
495 <https://www.ine.es>. Accessed: March 30, 2020.  
496
- 497 12. [https://covid19.isciii.es/resources/serie\\_historica\\_acumulados.csv](https://covid19.isciii.es/resources/serie_historica_acumulados.csv). Accessed: April 12,  
498 2020.  
499
- 500 13. Giovanna Cowley, Eunice Teixeira Da Silva, Meno Nabicassa, Pedrozinho Duarte Pereira  
501 De Barros, Milena Mbote Blif, Robin Bailey, Anna Last. Is trachoma on track for elimination

502 by 2020? Monitoring and surveillance after mass drug administration with azithromycin for  
503 active trachoma in Guinea Bissau. *BMJ Global Health* 2, A62 (2017).

504

505 14. Qun Li, Xuhua Guan, Peng Wu, Xiaoye Wang, Lei Zhou, Yeqing Tong, Ruiqi Ren,  
506 Kathy S.M. Leung, Eric H.Y. Lau, Jessica Y. Wong, Xuesen Xing, Nijuan Xiang, Yang Wu,  
507 Chao Li, Qi Chen, Dan Li, Tian Liu, B.Med Jing Zhao, Man Liu, Wenxiao Tu, Chuding  
508 Chen, Lianmei Jin, Rui Yang, Qi Wang, Suhua Zhou, Rui Wang, Hui Liu, Yinbo Luo,  
509 Yuan Liu, Ge Shao, B.Med Huan Li, Zhongfa Tao, Yang Yang, Zhiqiang Deng, Boxi Liu,  
510 Zhitao Ma, Yanping Zhang, Guoqing Shi, Tommy T.Y. Lam, Joseph T. Wu, George F. Gao,  
511 D.Phil Benjamin J. Cowling, Bo Yang, Gabriel M. Leung, Zijian Feng. Early Transmission  
512 Dynamics in Wuhan, China, of Novel Coronavirus-Infected Pneumonia. *N Engl J Med* 382,  
513 1199-1207 (2020). doi:10.1056/NEJMoa2001316.

514

515 15. Rebecca Kahn, Corey M. Peak, Juan Fernández-Gracia, Alexandra Hill, Amara Jambai,  
516 Louisa Ganda, Marcia C. Castro, and Caroline O. Buckee. Incubation periods impact the  
517 spatial predictability of cholera and Ebola outbreaks in Sierra Leone. *Proc. Natl. Acad. Sci*  
518 *USA* 117, 5067-5073 (2020).

519

520 16. Christophe Fraser, Steven Riley, Roy M. Anderson, and Neil M. Ferguson. Factors that  
521 make an infectious disease outbreak controllable. *Proc. Natl. Acad. Sci. USA* 101, 6146-6151  
522 (2004).

523

524 17. Corey M. Peak, Lauren M. Childs, Yonatan H. Grad, and Caroline O. Buckee. Comparing  
525 nonpharmaceutical interventions for containing emerging epidemics. *Proc. Natl. Acad. Sci*  
526 *USA* 114, 4023-4028 (2017).

527

528 18. J Wallinga and M Lipsitch. How generation intervals shape the relationship between  
529 growth rates and reproductive numbers. *Proc. R. Soc. B.* 274, 599–604 (2007).

530

531 19. A. Aleta, Y. Moreno, Y. Evaluation of the potential incidence of COVID-19 and  
532 effectiveness of contention measures in Spain: a data-driven approach. *medRxiv.* (2020). doi:  
533 10.1101/2020.03.01.20029801. Available at:

534 <https://www.medrxiv.org/content/10.1101/2020.03.01.20029801v2>

535

536 20. J. Gómez-Gardenes, D. Soriano-Panos, A. Arenas. Critical regimes driven by recurrent  
537 mobility patterns of reaction-diffusion processes in networks. *Nat Phys* 14: 391-5 (2018).

538

539 21. A.J. Kucharski, T.W. Russell, C. Diamond, Y. Liu, J. Edmunds, S. Funk, R.M. Eggo,  
540 Centre for Mathematical Modelling of Infectious Diseases COVID-19 working group. Early  
541 dynamics of transmission and control of COVID-19: a mathematical modelling study. *Lancet*  
542 *Infect Dis.* 20, 553-558 (2020). doi: 10.1016/S1473-3099(20)30144-4.

543

544 22. Qianying Lin, Shi Zhao, Daozhou Gao, Yijun Lou, Shu Yang, Salihu S. Musa, Maggie H.  
545 Wang, Yongli Cai, Weiming Wang Lin Yang, Daihai He. A conceptual model for the  
546 coronavirus disease 2019 (COVID-19) outbreak in Wuhan, China with individual reaction  
547 and governmental action. *Int. J. Inf. Dis.* 93, 211–216 (2020).

548

549 23. Joseph T. Wu, Kathy Leung, Mary Bushman, Nishant Kishore, Rene Niehus, Pablo M. de  
550 Salazar, Benjamin J. Cowling, Marc Lipsitch, Gabriel M. Leung. Estimating clinical severity

- 551 of COVID-19 from the transmission dynamics in Wuhan, China. *Nat. Med.* 26, 506–510  
552 (2020).  
553
- 554 24. Yan Bai, Lingsheng Yao, Tao Wei, Fei Tian, Dong-Yan Jin, Lijuan Chen, Meiyun Wang.  
555 Presumed Asymptomatic Carrier Transmission of COVID-19. *JAMA* 323(14):1406-1407  
556 (2020). doi: 10.1001/jama.2020.2565.  
557
- 558 25. Zhen-Dong Tong, An Tang, Ke-Feng Li, Peng Li, Hong-Ling Wang, Jing-Ping Yi, Yong-  
559 Li Zhang, Jian-Bo Yan. Potential Presymptomatic Transmission of SARS-CoV-2, Zhejiang  
560 Province, China, 2020. *Emerg. Infect. Dis* 26,1052-1054 (2020).  
561
- 562 26. Sean Wei Xiang Ong, Yian Kim Tan, Po Ying Chia, Tau Hong Lee, Oon Tek Ng,  
563 Michelle Su Yen Wong, Kalisvar Marimuthu . Air, Surface Environmental, and Personal  
564 Protective Equipment Contamination by Severe Acute Respiratory Syndrome Coronavirus 2  
565 (SARS-CoV-2) From a Symptomatic Patient. *JAMA* 323, 1610-1612 (2020). doi:  
566 10.1001/jama.2020.3227.  
567
- 568 27. Luca Ferretti, Chris Wymant, Michelle Kendall, Lele Zhao, Anel Nurtay, Lucie Abeler-  
569 Dörner, Michael Parker, David Bonsall, Christophe Fraser. Quantifying SARS-CoV-2  
570 transmission suggests epidemic control with digital contact tracing. *Science*  
571 10.1126/science.abb6936 (2020) Mar 31. pii: eabb6936. doi: 10.1126/science.abb6936.  
572
- 573 28. P.E. Fine. Herd immunity: history, theory, practice. *Epidemiol Rev* 15, 265-302 (1993).  
574



- 575 29. Seth Flaxman, Swapnil Mishra, Axel Gandy, H Juliette T Unwin, Helen Coupland,  
576 Thomas A Mellan, Harrison Zhu, Tresnia Berah, Jeffrey W Eaton, Pablo N P Guzman, Nora  
577 Schmit, Lucia Callizo, Imperial College COVID-19 Response Team, Charles Whittaker,  
578 Peter Winskill, Xiaoyue Xi, Azra Ghani, Christl A. Donnelly, Steven Riley, Lucy C Okell,  
579 Michaela A C Vollmer, Neil M. Ferguson, Samir Bhatt. Estimating the number of infections  
580 and the impact of non-pharmaceutical interventions on COVID-19 in 11 European countries.  
581 Imperial College COVID-19 Response Team Report. (2020). March 30; doi: DOI:  
582 10.25561/77731. Available at: [https://www.imperial.ac.uk/](https://www.imperial.ac.uk/media/imperial-)  
583 [college/medicine/mrc-gida/2020-03-30-COVID19-Report-13.pdf](https://www.imperial.ac.uk/media/imperial-college/medicine/mrc-gida/2020-03-30-COVID19-Report-13.pdf)  
584  
585 30. J. Riou, C.L. Althaus. Pattern of early human-to-human transmission of Wuhan 2019  
586 novel coronavirus (2019-nCoV), December 2019 to January 2020. *Euro Surveill* 25 (4),  
587 pii=2000058 (2020) doi:10.2807/1560-7917.ES.2020.25.4.2000058.

588 **Figure legends**

589

590 **Fig. 1. Active and cumulative infected time series in the Balearic Islands.** Time evolution  
591 of the average number of (A) active infected cases (black line) and (B) accumulated number  
592 of cases with the best-fitted parameters, and confidence interval CI 90% (grey area). Red dots  
593 represent the data provided by the Ministry of Health of Spain, and the solid lines depict the  
594 model with the fitted parameters  $T_{\text{lat}}=2$ ,  $T_{\text{inf}}=4$ ,  $T_{\text{dis}}=12$ ,  $\beta_1=0.24$ ,  $\beta_2=0.12$ ,  $\beta_3=0.016$ ,  
595  $\beta_4=0.036$ ,  $\beta_5=0$ .

596

597 **Fig. 2. Secondary outbreak appearing after the home-based confinement is removed.**

598 The lockdown is removed and the parameter values are as during the week of March 16<sup>th</sup>-  
599 22<sup>nd</sup>. (A) First infected case is on February 7<sup>th</sup>, the number of infected in the first wave has  
600 not reached herd immunization and a second wave is triggered by a single infected case. The  
601 intensity of the second wave is one order of magnitude larger than the first. (B) First infected  
602 case is on January 28<sup>th</sup>, the number of infected in the first wave has reached a larger fraction  
603 of the population and the intensity of the second wave is, in the scenario, smaller than the  
604 first. Average over 100 realizations.

605

606 **Fig. 3. Fraction of infected individuals (in logarithmic scale) as a function of the date of**

607 **the first infection.** (A) Each line corresponds to the following parameter values ( $T_{\text{lat}}$ ,  
608  $T_{\text{inf}}$ )=(1,5) (black), (2,4) (red), (3,33) (orange), (4,2) (magenta), and (5,1) (blue). (B) Fraction  
609 of infected cases as a function of the first infection and the initial number of infected  
610 individuals. The radius of the symbol is proportional to the fraction of infected cases while  
611 the color indicates the probability that a realization of the model reaches at least 50% of  
612 infected cases in the population,  $P_{50}$ .

613 **FIGURES**

614 **Figure 1.**

615

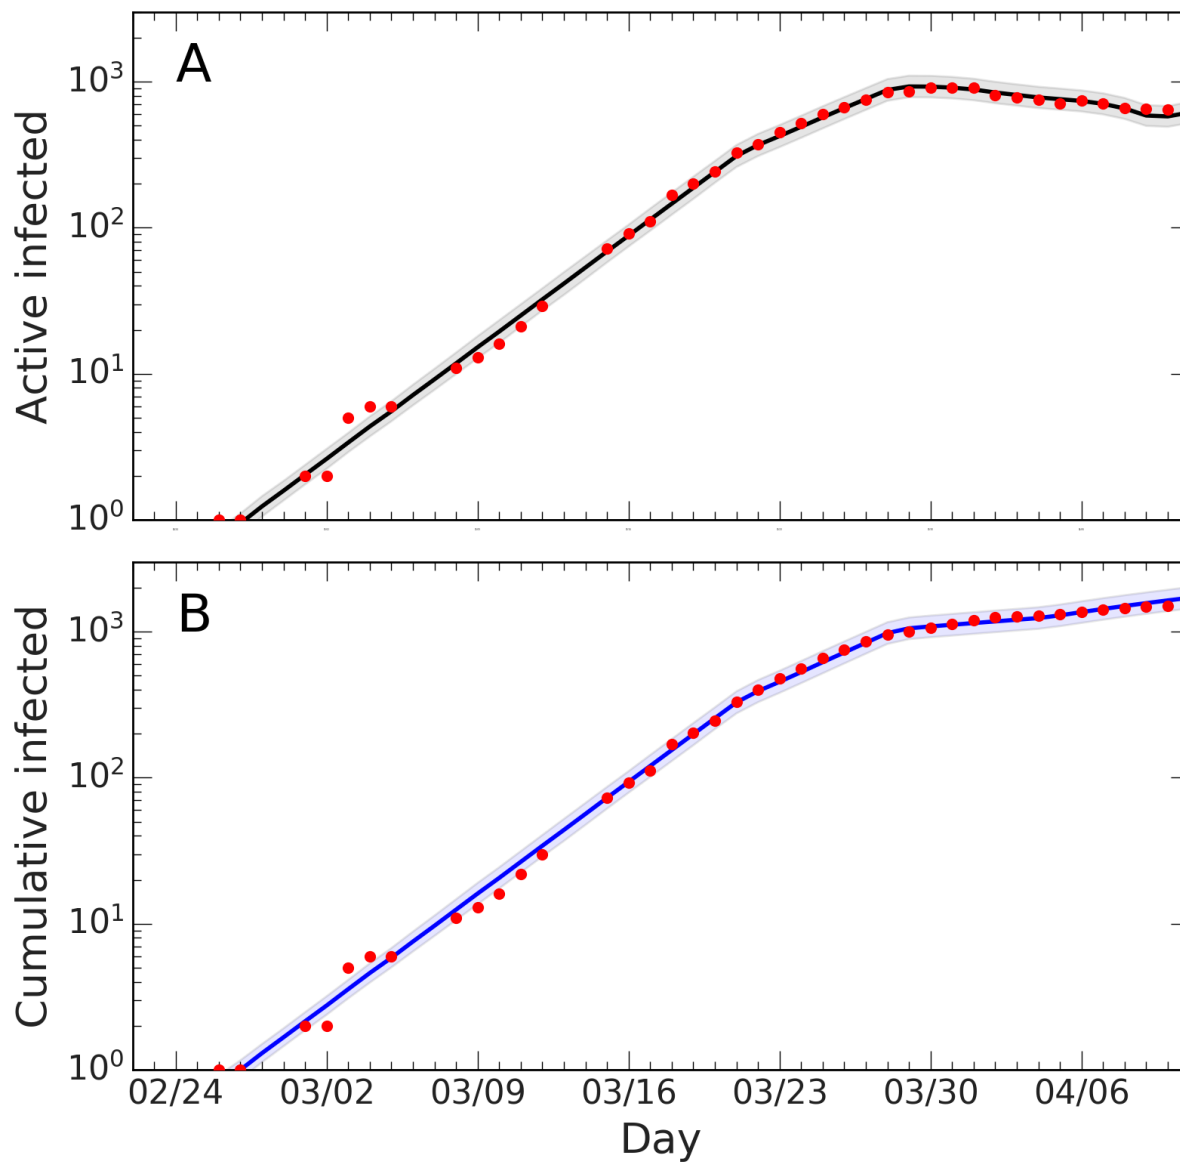

616

617

618 **Figure 2.**

619

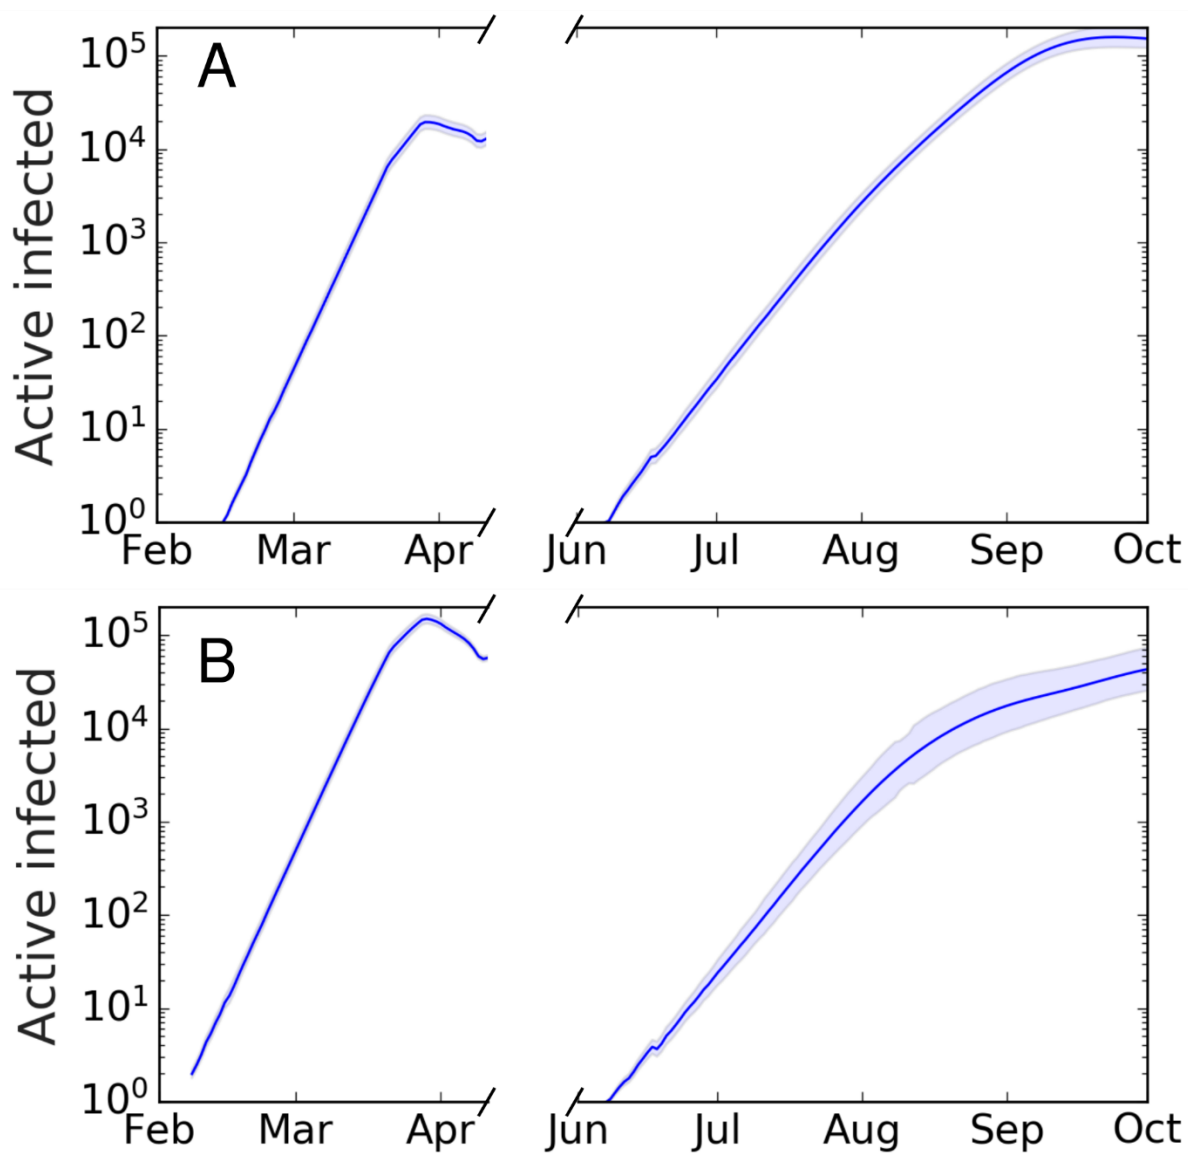

620

621

622

623

624

625

626

627



629 **Figure 3.**

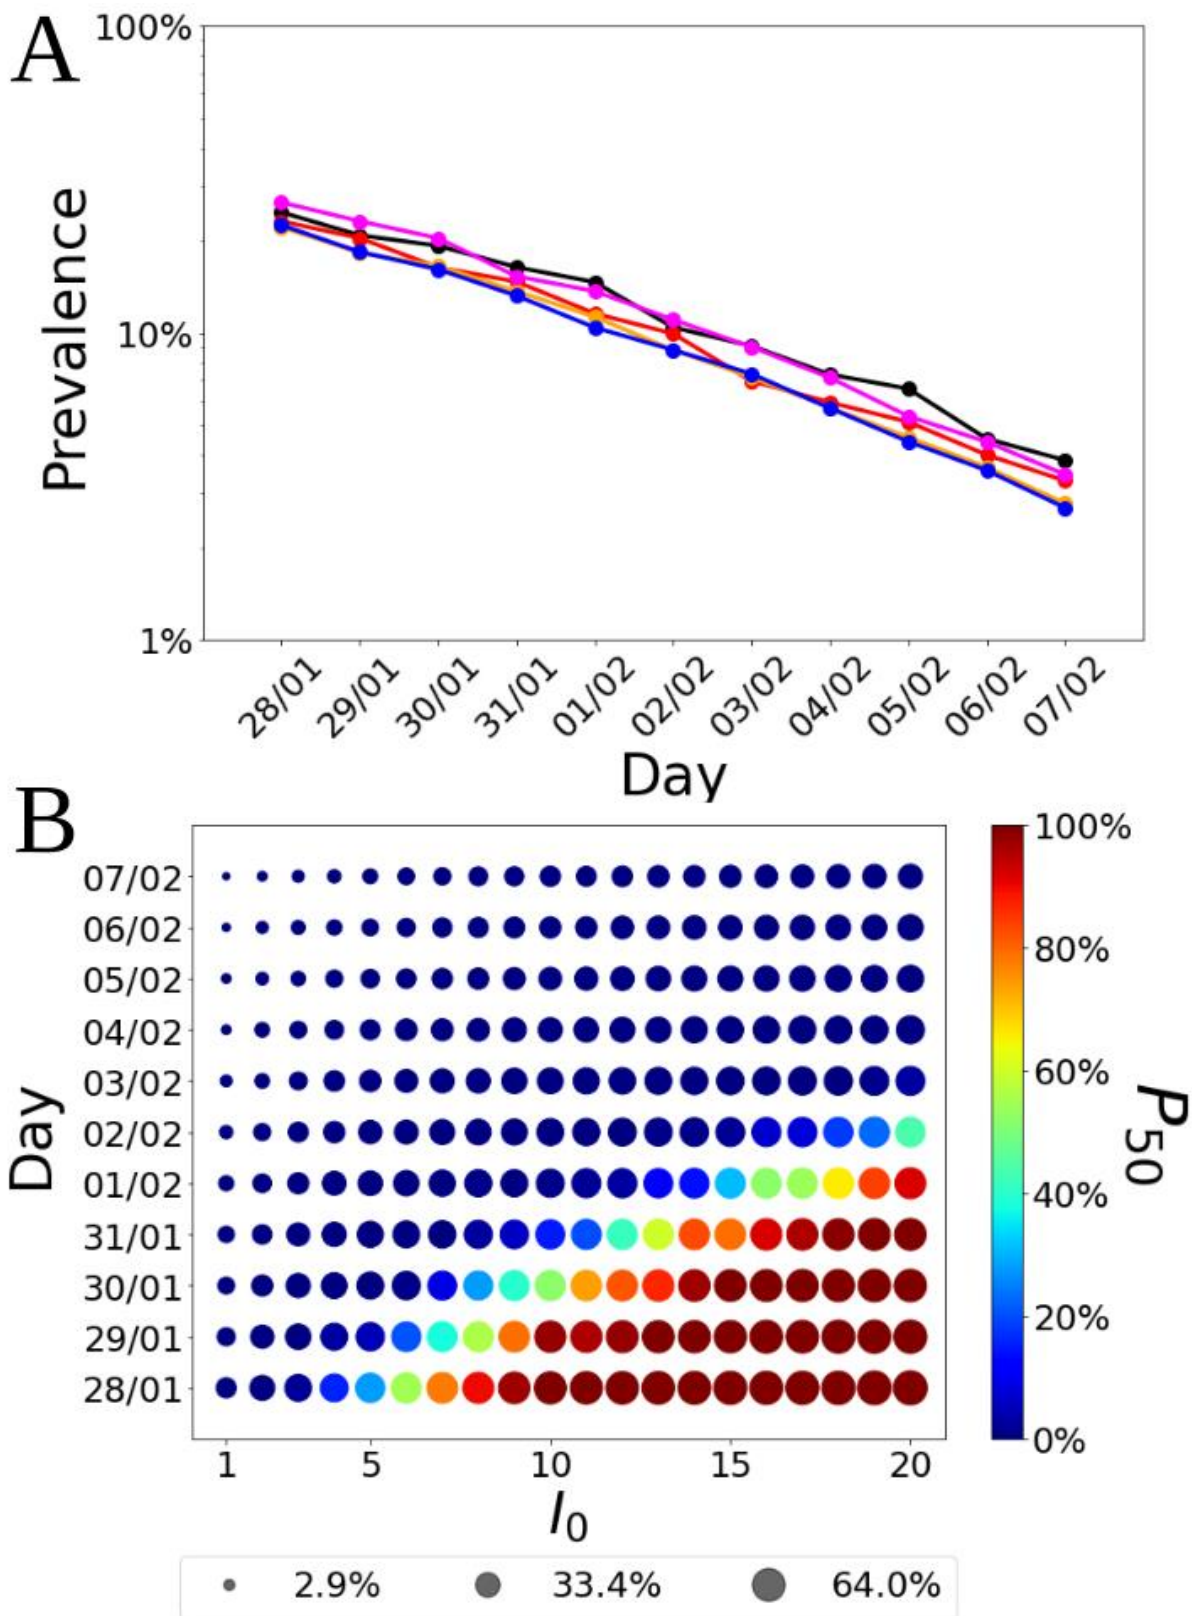

630

631

632
